# Supplementary material for: Monitoring of persistent organic pollutants in Africa. Part 2: Design of a network to monitor the continental and intercontinental background
Source: Royal Society of Chemistry journal article supplement (doi:10.1039/b913418b), 2009-01-01
Supplement: b913418b.pdf [file b913418b.pdf]

**Electronic Supplementary Information**

Table ESI 1: Statistics of POPs measurements during the pilot phase sampling programme as 6-month mean mass (ng/sample), for PCDDs and PCDFs I-TEQ (pg I-TEQ/sample), together with meteorological data (min-max monthly mean, sum) and site classification. IA = international airport, IS = industrial site.

| Station          | Site type   | Meteorological characteristics |                           |                                                    | Pollution |      |      |      |                 |       |
|------------------|-------------|--------------------------------|---------------------------|----------------------------------------------------|-----------|------|------|------|-----------------|-------|
|                  |             | Air temperature (°C)           | Relative air humidity (%) | Precipitation totals (mm) / (number of rainy days) | PCBs      | HCHs | DDTs | HCBs | PCDDs and PCDFs | PAHs  |
| Tunis (Tunisia)  | Residential | 12.8-24.9                      | 65-83                     | 0-57 / 0-12 <sup>14</sup>                          | 11.7      | 2860 | 3.4  | 10.2 | 12.8            | 1607  |
| Cairo (Egypt)    | Urban       | 12.6-29.3                      | 41-60                     | 0-10 / 0-6                                         | 38.8      | 60.3 | 38.3 | 38.5 | 561             | 11636 |
| Khartoum (Sudan) | Urban       | 23.1-35.1                      | 18-57                     | 0-3 / 0-1                                          | 23.6      | 12.4 | 75.3 | 5.0  | 28.8            | 4231  |

|                         |                     |                         |                     |                                |      |      |      |     |      |       |
|-------------------------|---------------------|-------------------------|---------------------|--------------------------------|------|------|------|-----|------|-------|
| Tombouctou (Mali)       | Residential         | 19.1-35.7               | 16-33               | 0-9 / 0-1                      | 1.2  | 4.0  | 1.8  | 3.4 |      | 688   |
| Dakar (Senegal)         | Urban<br>industrial | 22.7-26.2               | 55-91               | 0-2 / 0-1                      | 93.3 | 20.1 | 411  | 3.5 | 79.3 | 9279  |
| Niono (Mali)            | Agricultural        | 20-32                   | <sup>16)</sup>      | 0-8                            | 1.4  | 4.5  | 10.9 | 2.3 |      | 1890  |
| Bamako Centre<br>(Mali) | Urban <sup>1</sup>  | 22.8-31.4               | 23-74               | 0-111 /<br>0-9                 | 20.0 | 22.3 | 113  | 3.9 |      | 5040  |
| Bamako IA (Mali)        | Urban               | <sup>6)</sup>           | <sup>6)</sup>       | - / 0-7                        | 12.0 | 14.1 | 37.7 | 2.7 |      | 1726  |
| Koutiala (Mali)         | Agricultural        | 22.3-32.5               | 30-75               | 0-174 /<br>0-10                | 3.7  | 10.4 | 37.3 | 2.8 |      | 9255  |
| Sheda (Nigeria)         | Agricultural        | -                       | -                   | -                              | 3.7  | 6.9  | 6.4  | 2.5 |      | 3669  |
| Koumakonda(Togo)        | Agricultural        | 26.4-29.4 <sup>10</sup> | 53-90 <sup>10</sup> | 0-246 /<br>0-13 <sup>10</sup>  | 2.4  | 60.8 | 4.6  | 3.1 | 2.0  | 2310  |
| Kwabinya (Ghana)        | Residential         | -                       | 70-89 <sup>12</sup> | - / 19-<br>31 <sup>12,13</sup> | 10.1 | 8.1  | 5.2  | 2.8 | 22.9 | 1951  |
| East Legon (Ghana)      | Residential         | -                       | <sup>6)</sup>       | <sup>6)</sup>                  | 12.8 | 9.1  | 12.1 | 2.4 |      | 3383  |
| Asela (Ethiopia)        | Residential         | 16.8-18.9 <sup>4</sup>  | 25-44 <sup>4</sup>  | 0-94/ 0-                       | 1.8  | 16.5 | 108  | 4.1 | 2.7  | 14547 |

|                                  |                           |                        |                    |                              |      |      |      |      |                   |      |
|----------------------------------|---------------------------|------------------------|--------------------|------------------------------|------|------|------|------|-------------------|------|
|                                  |                           |                        |                    | 17 <sup>4</sup>              |      |      |      |      |                   |      |
| Mt Kenya (Kenya)                 | Remote                    | -                      | -                  | -                            | 1.4  | 9.9  | 1.9  | 3.8  | 0.7 <sup>11</sup> | 185  |
| Kitengela (Kenya)                | Agricultural <sup>1</sup> | 18.7-20.9 <sup>5</sup> | 0-48 <sup>5</sup>  | 2-193 /<br>1-12 <sup>5</sup> | 4.8  | 4517 | 3979 | 16.2 |                   | 1117 |
| Dandora (Kenya)                  | Agricultural <sup>2</sup> | 6)                     | 6)                 | 6)                           | 26.0 | 14.0 | 25.0 | 14.8 |                   | 8147 |
| Nairobi IS (Kenya)               | Industrial                | 6)                     | 6)                 | 6)                           | 40.9 | 9.1  | 54.2 | 6.4  |                   | 7147 |
| Kabete (Kenya)                   | Residential               | 6)                     | 6)                 | 6)                           | 2.2  | 10.5 | 7.7  | 2.0  |                   | 1942 |
| Orstom de<br>Brazzaville (Congo) | Urban                     | 23.6-26.7 <sup>3</sup> | 88-93 <sup>3</sup> | 0-125 /<br>0-10 <sup>3</sup> | 10.3 | 12.9 | 16.9 | 2.6  | 8.0               | 3390 |
| Kinshasa (Congo<br>DR)           | Urban                     | -                      | -                  | -                            | 39.1 | 12.6 | 44.7 | 2.1  |                   | 6423 |
| Lusaka IA (Zambia)               | Urban                     | 16.9-27.3              | -                  | - / 0-25 <sup>15</sup>       | 3.5  | 4.2  | 36.5 | 2.8  | 1.7 <sup>11</sup> | 1618 |
| Reduit (Mauritius)               | Remote                    | 24.3-27.9 <sup>7</sup> | 79-84              | 66-338/<br>8-18              | 1.8  | 6.8  | 9.3  | 2.0  |                   | 3127 |
| Vanderbijl Park<br>(RSA)         | Industrial                | 13.2-23.3 <sup>9</sup> | 47-60 <sup>9</sup> | 8-247 /<br>2-5 <sup>9</sup>  | 3.1  | 23.4 | 3.5  | 3.4  |                   | 5434 |

|                  |        |                        |                    |                         |     |     |     |     |     |     |
|------------------|--------|------------------------|--------------------|-------------------------|-----|-----|-----|-----|-----|-----|
| Molopo (RSA)     | Remote | 13.6-28.1 <sup>8</sup> | 29-38 <sup>8</sup> | 7-73 / 1-8 <sup>8</sup> | 1.8 | 4.7 | 1.8 | 1.4 | 0.8 | 423 |
| Barberspan (RSA) | Remote | <sup>6)</sup>          | <sup>6)</sup>      | <sup>6)</sup>           | 1.4 | 7.1 | 2.9 | 1.6 |     | 385 |

PCBs = sum of PCB 28, PCB 52, PCB 101, PCB 118, PCB 153, PCB 138, and PCB 180, HCHs = sum of  $\alpha$ -,  $\beta$ -,  $\gamma$ -, and  $\delta$ -hexachlorocyclohexane isomers, DDTs = sum of o,p'- and p,p'-DDT, -DDE and DDD, HCBs = sum of hexachlorobenzene (HCB) and pentachlorobenzene (PeCB), PCDDs and PCDFs = 11 and 14 species, respectively, PAHs = sum of naphthalene, acenaphthylene, acenaphthene, fluorene, phenanthrene, anthracene, fluoranthene, pyrene, benzo(a)anthracene, chrysene, benzo(b)fluoranthene, benzo(k)fluoranthene, benzo(a)pyrene, indeno(123cd)pyrene, dibenz(ah)anthracene and benzo(ghi)perylene (= 16 EPA PAHs).

Sites geographical coordinates: cf. Klánová et al., 2009.

<sup>1</sup> obsolete pesticide dumping site

<sup>2</sup> waste dumping site

<sup>3</sup> data reported from two stations combined

<sup>4</sup> data from Addis Abeba station, 8°59'N/38°48'E, 2324 m a.s.l.

<sup>6</sup> data from Nairobi station, 1°19'N/36°55'E, 1624 m a.s.l.

<sup>6</sup> no data, cf. station in line above

<sup>7</sup> data from St.Brandon station, 16°27'N/59°37'E, 3 m a.s.l.

<sup>8</sup> data from Upington station 28°24'S/21°16'E, 836 m a.s.l.

<sup>9</sup>data from Pretoria station 25°44'S/28°11'E, 1330 m a.s.l.

<sup>10</sup>data from Atakpame station 7°35'N/1°07'E, 402 m a.s.l.

<sup>11</sup>April-June covered only

<sup>12</sup>January-March covered only

<sup>13</sup>estimated based on relative humidity measurements (daily maximum > 98%)

<sup>14</sup>data from Carthago station, 36°52'N/10°20'E

<sup>15</sup>dates do not match with months, but deviate by 3-7 days

<sup>16</sup>no data, cf. station in line below
